1 ***Escherichia coli* NusG links the lead ribosome with the transcription elongation**  
2 **complex**

3

4 Robert S. Washburn<sup>1</sup>, Philipp K. Zuber<sup>2</sup>, Ming Sun<sup>3,4</sup>, Yaser Hashem<sup>5,6</sup>, Bingxin Shen<sup>5,7</sup>,  
5 Wen Li<sup>5</sup>, Sho Harvey<sup>8,9</sup>, Stefan H. Knauer<sup>2,\*</sup>, Joachim Frank<sup>3,5,\*</sup>, and Max E.  
6 Gottesman<sup>1,5,\*</sup>

7

8 <sup>1</sup>Department of Microbiology & Immunology, Columbia University Medical Center,  
9 New York, NY 10032, USA.

10 <sup>2</sup>Biopolymers, University of Bayreuth, Universitaetsstrasse 30, 95447 Bayreuth,  
11 Germany.

12 <sup>3</sup>Department of Biological Sciences, Columbia University, New York, NY 10027, USA.

13 <sup>4</sup>Current address: University of California at San Francisco, San Francisco, CA 94158,  
14 USA.

15 <sup>5</sup>Department of Biochemistry and Molecular Biophysics, Columbia University Medical  
16 Center, New York, NY 10032, USA.

17 <sup>6</sup>Current address: NSERM U1212, Institut Européen de Chimie et Biologie, University of  
18 Bordeaux, Pessac 33607, France.

19 <sup>7</sup>Current address: Bristol-Myers Squibb Pharmaceutical Co., New Brunswick, NJ 08901,  
20 USA.

21 <sup>8</sup>University of Michigan, Ann Arbor, MI 48109, USA.

22 <sup>9</sup>Current address: California Institute of Technology, Pasadena, CA 91125, USA.

23

24 \*Corresponding Authors

25 **Abstract**

26 It has been known for more than 50 years that transcription and translation are physically  
27 coupled in bacteria, but whether or not this coupling may be mediated by the two-domain  
28 protein N-utilization substance (Nus) G in *Escherichia coli* is still heavily debated. Here,  
29 we combine integrative structural biology and functional analyses to provide conclusive  
30 evidence that NusG can physically link transcription with translation by contacting both  
31 RNA polymerase and the ribosome. We present a cryo-electron microscopy structure of a  
32 NusG:70S ribosome complex and nuclear magnetic resonance spectroscopy data  
33 revealing simultaneous binding of NusG to RNAP and the intact 70S ribosome, providing  
34 the first direct structural evidence for NusG-mediated coupling. Furthermore, *in vivo*  
35 reporter assays show that recruitment of NusG occurs late in transcription and strongly  
36 depends on translation. Thus, our data suggest that coupling occurs initially via direct  
37 RNAP:ribosome contacts and is then mediated by NusG.

38

## 39 **Introduction**

40

41 Gene expression is a universal process in all cells and consists of transcription, i.e. the  
42 synthesis of RNA based on the DNA, and – if RNA is not the final gene product –  
43 translation, i.e. the messenger RNA (mRNA)-guided synthesis of a protein. Since the late  
44 1960s it has been known that the rates of transcription and translation are synchronized in  
45 *Echerichia coli* so that mRNA is translated while being transcribed (Das et al., 1967;  
46 Mehdi and Yudkin, 1967; Miller et al., 1970; Proshkin et al., 2010; Vogel and Jensen,  
47 1995, 1994). This process, called transcription:translation coupling, is possible due to the  
48 lack of a physical barrier between transcription and translation in bacteria (reviewed in  
49 (Conn et al., 2019)). Only recently, direct physical interactions between RNA polymerase  
50 (RNAP) and the ribosomes have been demonstrated (Demo et al., 2017; Fan et al., 2017;  
51 Kohler et al., 2017), consistent with earlier observations that transcriptional events may  
52 control translation activity and *vice versa* (Proshkin et al., 2010). As transcription and  
53 translation are closely connected to other central processes in a bacterial cell, such as  
54 DNA repair (Pani and Nudler, 2017) and protein folding (Thommen et al., 2017),  
55 transcription:translation coupling constitutes one of the key regulatory functions in  
56 bacterial gene expression.

57         However, there are also indications that transcription:translation coupling may  
58 involve a member of the family of N-utilization substance (Nus) G proteins, which serves  
59 as adapter connecting RNAP and the lead ribosome (Burmam et al., 2012, 2010; Saxena  
60 et al., 2018; Zuber et al., 2019). *E. coli* Nus G, member and eponym of the only  
61 universally conserved class of transcription factors (Werner, 2012), consists of two

62 domain, an N- and a C-terminal domain (NTD and CTD, respectively) connected *via* a  
63 flexible linker, which move independently (Burmam et al., 2011; Mooney et al., 2009).  
64 NusG-NTD binds RNAP and accelerates transcription elongation (Burova et al., 1995;  
65 Kang et al., 2018; Mooney et al., 2009). Structural studies demonstrate that NusG-CTD,  
66 which is a five-stranded  $\beta$ -barrel with a Kyrpides-Ouzounis-Woese motif (Kyrpides et al.,  
67 1996), is a versatile binding platform for different transcription factors. By binding to  
68 protein S10, which is part of the 30S subunit of the ribosome, NusG may link  
69 transcription and translation (Burmam et al., 2010). Saxena *et al* also demonstrated  
70 specific 1:1 binding of NusG to 70S ribosomes both *in vitro* and *in vivo* (Saxena et al.,  
71 2018).

72 S10 is identical with transcription factor NusE and forms a ribosome-free  
73 complex with NusB, NusA and NusG which suppresses transcription termination  
74 (Dudenhoeffer et al., 2019; Krupp et al., 2019; Said et al., 2017; Squires et al., 1993).  
75 Finally, NusG-CTD binds to termination factor Rho and is required for most Rho activity  
76 *in vivo* (Burmam et al., 2010; Lawson et al., 2018; Mitra et al., 2017).  
77 Transcription:translation coupling prevents Rho factor from terminating transcription by  
78 sequestering the NusG-CTD and by blocking Rho access to RNAP via untranslated  
79 mRNA. Cryptic *E. coli* Rho-dependent terminators located within open reading frames  
80 (orfs) are revealed when ribosomes are released by polar nonsense mutations (Cardinale  
81 et al., 2008; Newton et al., 1965).

82 Nevertheless, there is evidence for intragenic uncoupling and Rho-dependent  
83 transcription termination in the absence of nonsense mutations. Washburn and  
84 Gottesman (Washburn and Gottesman, 2011) and Dutta et al. (Dutta et al., 2011) found

85 that Rho resolves clashes between transcription and replication. Such conflicts are likely  
86 to occur within, rather than at the end of, genes. Uncoupling would allow Rho to release  
87 the stationary transcription elongation complexes (TECs).

88 Mutations in *nusE* or *nusG* that uncouple transcription from translation increase  
89 sensitivity to chloramphenicol (Saxena et al., 2018). This antibiotic retards translation,  
90 breaking the bond between the lead ribosome and TEC. Uncoupled TEC may backtrack  
91 or terminate prematurely (Dutta et al., 2011).

92 In this report, we present a cryo-electron microscopy (cryo-EM) structure  
93 showing NusG binding to the S10 subunit in a 70S ribosome. The NusG-CTD binding  
94 site of S10 is also target of the ribosome-release factor, transfer-messenger (tmRNA),  
95 raising the possibility that tmRNA might displace NusG at rare codons, thereby  
96 uncoupling transcription from translation (Roche and Sauer, 1999). We also show by  
97 solution-state nuclear magnetic resonance (NMR) spectroscopy that NusG, once bound to  
98 RNAP, can interact with S10 or with a complete ribosome, setting the structural basis for  
99 coupling.

100 NusG couples transcription with translation *in vivo*, as proposed earlier (Burmam  
101 et al., 2010). Uncoupling of RNAP from the lead ribosome is enhanced when translation  
102 is compromised. Importantly, we demonstrate that uncoupled RNAP can outpace  
103 translation, leading to Rho-dependent transcription termination. This intragenic  
104 termination explains the necessity for the apparent perfect synchronization between  
105 transcription and translation (Proshkin et al., 2010).

106

107 **Results**

108 **Structural evidence of NusG binding to the ribosomal S10 subunit on a 70S**  
109 **ribosome.**

110 We assembled a NusG:70S complex by incubating 70S ribosomes with an excess of  
111 NusG and determined the structure of this complex by cryo-EM and single-particle  
112 reconstruction. Overall, 188,127 particles were extracted from 1327 images and ~5% of  
113 these particles showed an extra mass of density attached to the mass identified as protein  
114 S10 (Fig. 1A,B). This additional density perfectly matches the size of NusG-CTD,  
115 suggesting that NusG binds at the site predicted from the solution NMR structure of  
116 NusG-CTD bound to the free ribosomal protein S10 in a 1:1 stoichiometry (Fig. 1A,B;  
117 (Burmann et al., 2010)). The density map reconstructed from the class of NusG:70S  
118 particles was refined to an average resolution of 6.8 Å. No density could be observed for  
119 NusG-NTD, indicating that it is flexibly bound to the NusG-CTD and does not interact  
120 with the ribosome.

121 During translation ribosomes may stall on incomplete mRNAs, i.e. they reach the  
122 3' end of an mRNA without terminating, resulting in an unproductive translation  
123 complex. Together with the small protein B (SmpB) tmRNA can bind to these stalled  
124 ribosomes in order to rescue them and to tag the nascent polypeptide chain for  
125 degradation in a process called trans-translation (Weis et al., 2010). Interestingly, the  
126 NusG-CTD binding site overlaps with the region of S10 that is contacted by the tmRNA  
127 when it is bound to a ribosome in its resume state (Fig. 1C; (Burmann et al., 2010; Fu et  
128 al., 2010; Rae et al., 2019; Weis et al., 2010)). From this we conclude that NusG-CTD  
129 and tmRNA share binding sites on S10, raising the possibility that, in addition to

130 releasing stalled ribosomes, tmRNA competes with NusG for ribosome binding, thus  
131 preventing NusG from maintaining a linkage between the lead ribosome and RNAP. In  
132 other words, tmRNA might be able to displace NusG and thereby facilitate uncoupled  
133 transcription.

134

### 135 **Simultaneous binding of NusG to S10 and RNAP**

136 In the cryo-EM structure of *E. coli* NusG bound to a paused TEC (Kang et al., 2018) only  
137 the density of NusG-NTD was observable, indicating that NusG-CTD moves freely and  
138 does not interact with RNAP. Binding of NusG-CTD to S10 was observed both in a  
139 binary system (Burmam et al., 2010) and a  $\lambda$ N-dependent antitermination complex  
140 (Krupp et al., 2019; Said et al., 2017).

141 Since the NusG-CTD:S10 interaction is a prerequisite for NusG-mediated  
142 transcription:translation coupling, we probed this contact when NusG was bound to  
143 RNAP - but not in an antitermination context - by solution-state NMR spectroscopy. We  
144 employed NusG samples where [ $^1\text{H}$ ,  $^{13}\text{C}$ ]-labeled methyl groups of Ile, Leu, and Val  
145 residues in perdeuterated proteins served as NMR-active probes ([ILV]-NusG) to  
146 increase sensitivity, allowing us to study large systems.

147 In the methyl-transverse relaxation optimized spectroscopy (methyl-TROSY)  
148 spectrum of free [ILV]-NusG (Fig. 2A), signals of the NusG-NTD and NusG-CTD  
149 perfectly superimpose with the signals of the isolated [ILV]-labeled protein domains,  
150 suggesting that the domains move independently, confirming a previous report stating  
151 that there are no intramolecular domain interactions (Burmam et al., 2011). Upon  
152 addition of RNAP in a two-fold molar excess, [ILV]-NusG signals were significantly

153 decreased in the one-dimensional methyl-TROSY spectrum (Fig. 2B, inset), indicating  
154 [ILV]-NusG:RNAP complex formation. Binding of RNAP increases the molecular mass  
155 of [ILV]-NusG dramatically, resulting in enhanced relaxation, which ultimately leads to  
156 drastic line broadening and a decrease in signal intensity. Interestingly, the two-  
157 dimensional spectra revealed a non-uniform signal decrease (Fig. 2B), which is caused by  
158 a combination of several effects. First, there is a general loss of signal intensity due to the  
159 increase in molecular mass upon complex formation, as discussed above. Second, upon  
160 binding, methyl groups of Ile, Leu, and Val residues located in the binding surface come  
161 into close proximity of RNAP protons. Dipole-dipole interactions contribute to relaxation  
162 processes so that the signal intensity of these methyl groups is decreased more strongly  
163 than that of methyl groups located elsewhere in [ILV]-NusG. Finally, signal intensities  
164 may be affected by chemical exchange processes. We analyzed the signal intensity of  
165 [ILV]-NusG signals in the presence of RNAP quantitatively by calculating relative signal  
166 intensities, i.e. the ratio of the remaining signal intensity of [ILV]-NusG in the presence  
167 of RNAP to the signal intensity of free [ILV]-NusG (Figure 2-figure supplement 1).

168         The average relative intensity of NusG-NTD signals was significantly lower than  
169 that of the linker or the NusG-CTD, suggesting that NusG-NTD binds to RNAP whereas  
170 NusG-CTD remains flexible and moves independently, able to interact with other  
171 partners, as indicated by the NusG:TEC structure (Kang et al., 2018). The signal intensity  
172 of all Ile, Leu, and Val residues in the RNAP binding site of NusG was completely  
173 extinguished, confirming that NusG-NTD binds to RNAP at its known binding site  
174 (Drögemüller et al., 2015; Kang et al., 2018; Krupp et al., 2019; Said et al., 2017).



175 To test if NusG-CTD can bind to S10 while being tethered to RNAP *via* NusG-NTD,  
176 we titrated the [ILV]-NusG:RNAP complex with S10<sup>Δ</sup> (Fig. 2C). In order to increase  
177 stability, we used this S10 variant lacking the ribosome binding loop in complex with  
178 NusB (Luo et al., 2008). Chemical shift changes of [ILV]-NusG-CTD signals upon  
179 titration of [ILV]-NusG:RNAP with S10<sup>Δ</sup>:NusB were determined (Fig. 2D) and affected  
180 residues were mapped onto the three-dimensional structure of NusG-CTD (Fig. 2E).  
181 Strongly affected residues are found to be located in  $\beta$ -strands 3 and 4 as well as in the  
182 connecting loop, in agreement with the binding site observed in the binary NusG-  
183 CTD:S10<sup>Δ</sup> complex (Burmam et al., 2010). The loop between  $\beta$ -strands 1 and 2 is also  
184 part of the NusG-CTD:S10<sup>Δ</sup> binding site, but as it does not contain any Ile, Leu, or Val  
185 residues, no NMR-active probes are available in this region; nevertheless, affected  
186 residues can be found in  $\beta$ -strand 1, directly preceding this loop. This suggests that the  
187 CTD:S10<sup>Δ</sup> binding surface in the RNAP:NusG:S10<sup>Δ</sup>:NusB complex is identical to the one  
188 determined in the binary system. Importantly, the NusG-NTD signals do not change  
189 when S10 is added to the NusG:RNAP complex, indicating that S10 binding does not  
190 release the bound RNAP.

191 We conclude that the S10 interaction site of NusG-CTD is accessible in the  
192 NusG:RNAP complex and thus can promote ribosome binding and formation of a  
193 ribosome:NusG:RNAP complex.

194

195 To look for a ribosome:NusG-RNAP complex, we repeated the experiment using  
196 intact 70S ribosomes instead of S10<sup>Δ</sup>:NusB (Figure 3). In a first test, we titrated [ILV]-  
197 NusG with 70S ribosomes (Figure 3A). As in the [ILV]-NusG:RNAP experiment, signal

198 intensity of [ILV]-NusG methyl groups was significantly, but not uniformly, decreased.  
199 In the presence of a twofold molar excess of ribosomes some NusG-NTD signals  
200 remained visible, whereas most NusG-CTD signals were nearly completely extinguished.  
201 Quantitative analysis of the [ILV]-NusG methyl group signal intensity in the presence of  
202 0.5 equivalents of 70S ribosomes clearly shows that the relative intensity of NusG-CTD  
203 signals was in a narrow range  $< 2\%$ , whereas the relative intensity of NusG-NTD signals  
204 covered values from 0-4%, and was higher on average (Figure 3B). Relative intensities  
205 of zero of NusG-NTD signals can be attributed to the fact that these signals are weak  
206 even in free NusG, and can thus not be quantified upon ribosome binding. Due to the  
207 flexibility of the linker, signals corresponding to amino acids in this region had the  
208 highest relative signal intensities. From these results we conclude that NusG binds to the  
209 ribosome via its CTD, in agreement with our cryo-EM structure (Figure 1). Due to the  
210 drastic increase in molecular mass we were unable to determine a binding site from these  
211 experiments, but nevertheless, the pattern of intensity changes of NusG-CTD signals was  
212 similar to that resulting from the titration of RNAP-bound NusG with S10, i.e. the most  
213 drastic decrease of signal intensity can be observed for residues 160-170, which are part  
214 of  $\beta$ -strands 3 and 4 and the intervening loop. Consequently, we conclude that the  
215 ribosome binding site is identical with the binding site for isolated S10.

216       Next, we formed a complex of [ILV]-NusG and RNAP (molar ratio 1:2). The 2D  
217 methyl-TROSY spectrum of the complex revealed a decrease of signal intensities typical  
218 for NusG binding to RNAP (see Fig. 2C), i.e. primarily NusG-CTD signals remained  
219 visible. When we then added one equivalent of 70S ribosomes nearly all [ILV]-NusG  
220 signals were diminished (e.g. the signal corresponding to I164, which is in the loop

221 responsible for ribosome binding). Strikingly, the spectrum differs from the spectrum of  
222 [ILV]-NusG in the presence of 70S ribosome (Fig. 3A). These results can be explained  
223 by three scenarios: (i) NusG-NTD is bound to RNAP, NusG-CTD is bound to a  
224 ribosome, and the ribosome directly interacts with RNAP, (ii) NusG-NTD is bound to  
225 RNAP, NusG-CTD is bound to the ribosome, but the ribosome does not interact with  
226 RNAP, (iii) NusG-NTD is bound to RNAP, the ribosome directly interacts with RNAP,  
227 and NusG-CTD is free, but is in the vicinity of the ribosome. To exclude the last scenario  
228 we repeated the experiment using a NusG variant, NusG<sup>F165A</sup>, in which F165, essential  
229 for ribosome binding (Burmam et al., 2010; Knowlton et al., 2003), is substituted by an  
230 Ala. Having ensured that the amino acid substitution does not influence the structure of  
231 NusG (Fig. 3-figure supplement 1A) we tested in a control experiment [ILV]-NusG<sup>F165A</sup>  
232 binding to S10<sup>a</sup>. Indeed, we could detect no interaction (Fig. 3-figure supplement 1B,C).  
233 When we added 70S ribosomes to a preformed [ILV]-NusG<sup>F165A</sup>:RNAP complex (molar  
234 ratio 2:1), the spectrum corresponding to the [ILV]-NusG<sup>F165A</sup>:RNAP complex did not  
235 significantly change and, in particular, NusG-CTD signals remained visible, suggesting  
236 that the ribosome was not bound. However the general decrease in signal intensity  
237 indicated a direct RNAP:ribosome interaction. Thus, we conclude that NusG can serve as  
238 physical linker between ribosome and RNAP, although it remains elusive if a direct  
239 interaction between RNAP and a ribosome occurs in this NusG-coupled complex.

240

#### 241 **Translation promotes NusG attachment to TEC.**

242 Chromatin Immuno Precipitation (ChIP) analysis showed that NusG binds to TEC well  
243 after transcription and translation initiation (Mooney et al., 2009). Thus, we asked

244 whether translation was, in fact, required for attachment of NusG to TEC. To approach  
245 this question, we examined the effects of translation on NusG-mediated Rho-dependent  
246 termination within the *lac* operon (Fig. 4A, Table 1) as NusG recruitment to the TEC is  
247 necessary for efficient Rho-dependent termination. Rho-dependent termination occurs  
248 within *lacZ* both *in vitro* (Burns and Richardson, 1995) and, upon the introduction of *lacZ*  
249 nonsense mutations, *in vivo* (Adhya and Gottesman, 1978; Newton et al., 1965). Polarity  
250 was measured using a probe to *lacA*, comparing mRNA levels with or without treatment  
251 with the Rho inhibitor bicyclomycin (BCM). Wildtype (WT) cells revealed no detectable  
252 termination (Table 1, Fig. 4A-I), which may be attributed to (i) sequestering of NusG-  
253 CTD by the ribosome, (ii) binding of the ribosome to the nascent RNA, or (iii) both. In  
254 all scenarios, however, the presence of the translating ribosome prevents Rho binding.  
255 We interfered with translation initiation by mutating the ribosome-binding site, i.e. the  
256 Shine-Dalgarno (SD) sequence (Fig. 4A-II), or translation elongation by introducing six  
257 successive rare arginine codons at two different locations in *lacZ* (Fig. 4A III, IV).  
258 Introduction of two G to A mutations in the *lacZ* SD sequence prohibits translation  
259 initiation of *lacZ* (Fig. 4A-II). *lacA* mRNA measurements gave a read-through of 21%,  
260 indicating that Rho-dependent termination occurs, but was inefficient in the absence of  
261 translation of *lacZ* mRNA. Introduction of the six in-frame rare arginine residues at the  
262 +4 position of *lacZ* (Fig. 4A-III, Table 1) allowed 29% read-through, i.e. Rho-dependent  
263 termination is present, but still inefficient if translation of *lacZ* mRNA is interfered with  
264 at early elongation. In contrast, introduction of the rare arginine residues 200 nt from the  
265 start site of transcription (Fig. 4A-IV, Table 1) resulted in high polarity, yielding < 1 %

266 read-through. As efficient Rho-dependent termination requires NusG our results suggests  
267 that NusG binding to TEC occurs late and is dependent on translation.

268 To confirm the hypothesis that NusG failed to attach to TEC in the absence of  
269 translation, we asked if a complex comprising Nus factors A, B, and E (Nus complex)  
270 assembled at a  $\lambda$  *nutL* site was able to recruit NusG so that it associates with TEC.  
271 Accordingly, we introduced the  $\lambda$  *nutL* site just upstream of the flawed *lacZ* SD sequence  
272 and measured *lacA* mRNA (Figure 4B, Table 1). Indeed, Rho-dependent termination was  
273 highly efficient, indicating that NusG had been recruited to TEC. Thus,  
274 counterintuitively, the Nus complex, which normally suppresses transcription termination  
275 in ribosomal (*rrn*) operons and, together with  $\lambda$ N, on the phage  $\lambda$  chromosome,  
276 stimulates termination in this case.

277 We finally demonstrated that reduced termination efficiency in the mutant with  
278 the non-functional SD sequence was due to the failure of NusG recruitment to the TEC.  
279 In this assay we monitored Rho-dependent termination in a fusion construct that carries  
280  $\lambda$  *cro*, the  $\lambda$  *nutR* site, the Rho-dependent  $\lambda$  *tRI* terminator and a *lacZ* reporter, with *lacZ*  
281 expression being heat-inducible (Fig. 5). Termination at the  $\lambda$  *tRI* site is poor when *cro* is  
282 translated, as seen with the *cro ms27* fusion (Table 2A, Fig. 5A-I; in the presence of an  
283 intact SD sequence we used *cro ms27*, where codon 27 carries a missense mutation so  
284 that the resulting protein is non-functional). The 3' end of *cro* is adjacent to the  $\lambda$  *tRI*  
285 terminator, limiting the amount of free RNA available for Rho attachment if *cro* mRNA  
286 is translated. When  $\lambda$  *cro* carried a SD mutation translation initiation was ablated, but  
287 nevertheless there was significant termination at  $\lambda$  *tRI* (Table 2A, Figure 5A-II, compare  
288 read-through values with and without BCM). Formation of the Nus complex at  $\lambda$  *nutR*

289 allows NusG recruitment and efficient termination. In the absence of NusB, the complex  
290 does not assemble, and there is extensive read-through at  $\lambda$  *tRI*.

291 The *boxA69* mutation also reduces Nus complex formation at  $\lambda$  *nutR*, and like the  
292 *nusB*- mutation, enhances read-through of  $\lambda$  *tRI* (Table 2B, Fig. 5B). In this experiment,  
293 we suppressed termination at  $\lambda$  *tRI* with  $\lambda$  N antitermination factor instead of BCM.  
294 Finally, we showed that expression of *nusG-NTD*, which competes with NusG for  
295 binding to RNAP, enhances read-through (Table 2C, Fig. 5C). Taken together, these  
296 results strongly support the idea that NusG can be supplied by the Nus complex  
297 assembled at  $\lambda$  *nutR* in the absence of translation, inducing Rho-dependent termination at  
298  $\lambda$  *tRI*.

299

## 300 **Discussion**

301 We determined a cryo-EM structure of a NusG: 70S complex showing binding of one  
302 molecule NusG per ribosome, consistent with previous results (Saxena et al., 2018).  
303 NusG binds to the S10 protein on the 30S subunit via its CTD as indicated by the study of  
304 isolated NusG-CTD and S10 (Burmam et al., 2010); density for NusG-NTD was not  
305 observable, suggesting that it remains flexible. We must attribute the low occupancy of  
306 the NusG CTD on the 70S ribosome in the cryo-EM experiment to weak binding  
307 adversely affected by the conditions of sample preparation. Notably, although tmRNA  
308 contacts the ribosome at various sites, the binding of NusG-CTD and tmRNA on S10 is  
309 mutually exclusive. This suggests a model in which uncoupling at rare codons, at which  
310 tmRNA releases ribosomes, is promoted by tmRNA-induced release of NusG (Roche and  
311 Sauer, 1999). The freed NusG:TEC complex exposes the NusG-CTD, and is then subject  
312 to Rho-dependent transcription termination.

313 Simultaneous binding of NusG to S10 and RNAP has been demonstrated by  
314 solution-state NMR studies, confirming the S10 binding site on NusG-CTD as identified  
315 in a binary NusG-CTD:S10 system (Fig. 2) (Burmam et al., 2010). Moreover, we show  
316 that NusG can bind RNAP and 70S ribosome simultaneously; this is the first direct  
317 structural evidence for NusG-mediated transcription:translation coupling. The flexibility  
318 of the linker between the NusG-NTD and the NusG-CTD permits these interactions.  
319 The operon-specific *E. coli* NusG paralog, RfaH, likewise simultaneously binds S10 and  
320 RNAP in the context of a paused TEC (Burmam et al., 2012; Zuber et al., 2019). RfaH,  
321 which also comprises an NTD and a flexibly-connected CTD (Belogurov et al., 2007;  
322 Burmam et al., 2012), uses the same binding sites as NusG to interact with RNAP and

323 S10 (Burmam et al., 2012, 2010; Kang et al., 2018; Sevostyanova et al., 2011; Zuber et  
324 al., 2019). However, RfaH, unlike NusG, complexes with TEC early after transcription  
325 initiation, when TEC pauses at an operon polarity suppressor (*ops*) site, a representative  
326 of the *E. coli* consensus pause sequence (Larson et al., 2014; Vvedenskaya et al., 2014).  
327 Located in the untranslated leader region of RfaH-controlled operons, *ops* is responsible  
328 for sequence-specific recruitment of RfaH (Zuber et al., 2018). Importantly, RfaH-  
329 dependent operons lack a SD sequence. To initiate translation, RfaH recruits a ribosome  
330 to these mRNAs, making coupling essential for translation activation and efficient gene  
331 expression. The binding modes of RfaH and NusG to RNAP and S10 are very similar,  
332 indicating that coupling as observed for RfaH can also be mediated by NusG and vice  
333 versa. However, once recruited, RfaH excludes NusG, thus preventing intra-operon Rho-  
334 dependent transcription termination in RfaH-controlled operons (see (Artsimovitch and  
335 Knauer, 2019)).

336 We have confirmed the results of Mooney et al that NusG binds to TEC only after  
337 significant RNA synthesis (Mooney et al., 2009). As postulated by these authors, binding  
338 depends on active translation of the mRNA. Thus efficient Rho-dependent transcription  
339 termination, which requires the attachment of Rho to the NusG-CTD, does not occur at  
340 the end of an untranslated gene. We have shown that the failure of NusG to bind TEC is  
341 responsible for the absence of termination. Thus, placing a  $\lambda$  *nut* site at the start of the  
342 gene recruits NusG and restores termination. At present, it is not understood why NusG  
343 appears to be delivered to TEC by ribosomes *in vivo*, whereas it binds directly to RNAP  
344 in a purified system lacking ribosomes. A possible explanation would be that NusG binds  
345 to RNAP discontinuously in an on-and-off mode in the untranslated leader region and



346 that the NusG:RNAP interaction is only stabilized when the ribosome is coupled upon  
347 translation initiation. We should recall that NusG has two binding sites in the coupled  
348 system, which significantly increases its affinity.

349 In 1970, Miller *et al.* performed electron microscopy analyses of lysed *E. coli*  
350 cells (Miller et al., 1970). They demonstrated that all mRNA molecules are connected to  
351 the *E. coli* genome, and that the ribosome at the newly synthesized end of a polyribosome  
352 is almost always immediately adjacent to the putative RNAP molecule. They concluded  
353 that translation is completely coupled with transcription. Since NusG attaches to the TEC  
354 downstream to the translation initiation site, the elongating complex must initially consist  
355 of a ribosome bound directly to TEC, in agreement with the cryo-EM structures of an  
356 expressome (Kohler et al., 2017) and an RNAP:30S complex (Demo et al., 2017), as well  
357 as *in vitro* data (Fan et al., 2017). At some distance downstream, NusG recognizes and  
358 enters the complex. A cryo-EM analysis of a ribosome:RNAP complex reveals a structure  
359 with sufficient flexibility to accept NusG between the ribosome and RNAP (Demo et al.,  
360 2017). These authors suggest that NusG could enter the complex late, in agreement with  
361 our data. Thus we hypothesize that two coupling modes exist, a direct coupling between  
362 the ribosome and TEC during translation initiation and early elongation and a NusG-  
363 mediated coupling mode later in translation. The question of whether the 70S ribosome  
364 still directly contacts TEC in the NusG-mediated system remains elusive. The Kohler  
365 structure (Kohler et al., 2017) does not allow NusG binding to TEC and the 70S  
366 ribosome, thus the relative orientation of 70S ribosome to TEC might be different in the  
367 direct and the NusG-mediated system. The latter may thus require a reorientation of the  
368 TEC and the 70S ribosome and confer the system more flexibility, necessary to keep

369 transcription and translation synchronized, even if these processes are differently

370 regulated or occur at different rates.

371

372 **Methods**

373

374 **Strain Construction.** Standard bacteriological techniques used in strain construction  
375 (e.g., transformation, transduction and media preparation) are as described in Silhavy et  
376 al. (Silhavy et al., 1984). Standard molecular biology techniques were as described in  
377 Sambrook and Russell (Sambrook and Russel, 2001). N10780 was constructed by P1  
378 transduction of *rpoC-his:kanR nusGF165A* from NB885 into MDS42. N11158 was  
379 constructed by P1 transduction of  $\Delta$ *ssrA::camR* from RSW943 into MDS42. N11816  
380 was constructed by P1 transduction of  $\Delta$ *relA::kanR* from RLG847 into N11158.  
381 RSW1008 was constructed by P1 transduction of  $\Delta$ *ssrA::camR* from RSW943 into  
382 N4837. RSW1010 was constructed by P1 transduction of *rpoC-his:kanR nusGF165A*  
383 from NB885 into N4837. RSW1012 was constructed by P1 transduction of  $\Delta$ *ssrA::camR*  
384 from RSW943 into RSW1010. RSW1175 was constructed by P1 transduction of  
385  $\Delta$ *relA::kanR* and  $\Delta$ *spoT::camR* from RLG847 into MDS42. RSW1245 was generated  
386 using recombineering (Sharan et al., 2009) to introduce six rare arginine codons (atg-acc-  
387 atg-AGG-AGA-CGA-AGG-AGA-CGA-att-acg-gat) into the 5' end of *lacZ* in MDS42  
388 changing the amino acid sequence of the aminotermminus from MTMITD to  
389 MTMRRRRRRITD with six inefficiently translated arginine codons. RSW1225 was  
390 produced using recombineering to introduce two G to A mutations in the ribosome  
391 binding site of *lacZ* in MDS42. This resulted in a change from  
392 ...TTCACACAGGAAACAGCTatgaccatg... to ...TTCACACACC  
393 AAACAGCTatgaccatg...inactivating the ribosome binding site. RSW1225 is *lac*<sup>-</sup>.

394

395 **Cloning.** The plasmid encoding NusG-F165A was generated by site-directed  
396 mutagenesis according to the QuikChange Site-Directed Mutagenesis Kit (Stratagene),  
397 using vector pET11A\_ *nusG* (Burmam et al., 2011) as template and primers Fw\_ NusG-  
398 F165A (5' GTG TCT GTT TCT ATC GCG GGT CGT GCG ACC CCG 3') and  
399 Rv\_ NusG-F165A (5' CGG GGT CGC ACG ACC CGC GAT AGA AAC AGA CAC 3');  
400 both primers were obtained from metabion, Martinsried, Germany).

401

402 **Protein production and isotopic labeling.** NusG and NusG-NTD were produced as  
403 described (Burmam et al., 2011) as were NusG-CTD (Burmam et al., 2010) and RNAP  
404 and S10<sup>Δ</sup>:NusB used for NMR spectroscopy (Zuber et al., 2019). Production of NusG-  
405 F165A was analogous to NusG (Burmam et al., 2011). For unlabeled proteins, bacteria  
406 were grown in lysogeny broth (LB) medium. [<sup>1</sup>H, <sup>13</sup>C]-labeling of methyl groups of Ile,  
407 Leu, and Val residues in perdeuterated proteins was accomplished by growing bacteria in  
408 M9 medium (Meyer and Schlegel, 1983; Sambrook and Russel, 2001) prepared with  
409 increasing amounts of D<sub>2</sub>O (0 % (v/v), 50 % (v/v), 100 % (v/v); Eurisotop, Saint-Aubin,  
410 France) and (<sup>15</sup>NH<sub>4</sub>)<sub>2</sub>SO<sub>4</sub> (CortecNet, Voisins-Le-Bretonneux, France) and d<sub>7</sub>-glucose  
411 (Cambridge Isotope Laboratories, Inc., Tewksbury, USA) as sole nitrogen and carbon  
412 sources, respectively. Amino acid precursors (60 mg/l 2-keto-3-d<sub>3</sub>-4-<sup>13</sup>C-butyrate and 100  
413 mg/l 2-keto-3-methyl-d<sub>3</sub>-3-d<sub>1</sub>-4-<sup>13</sup>C-butyrate; Eurisotop, Saint-Aubin, France) were  
414 added 1 h prior to induction. Expression and purification protocols were identical to those  
415 of the non-labeled proteins.

416 Intact 70S ribosomes were produced as follows. *E. coli* strain MRE600 cells grown in LB  
417 medium were harvested, lysed by passing through the French Press 3x at ~800 PSI, and  
418 clarified by a short centrifugation (20,000 rpm, 40min) in opening buffer (20 mM Tris-  
419 HCl pH=7.5, 100mM NH<sub>4</sub>Cl, 10.5 mM Mg acetate, 0.5 mM EDTA, with half a protease  
420 inhibitor cocktail tablet (Roche, EDTA-free), and 1mM TCEP added just before use). The  
421 lysate was loaded onto the top of 5 mL sucrose cushion (20 mM Tris-HCl, pH=7.5, 500  
422 mM NH<sub>4</sub>Cl, 10.5 mM Mg acetate, 0.5 mM EDTA, 1.1 M sucrose, and 1 mM TCEP  
423 added before use) and centrifuged for 24 h at 28,000 rpm in a 70Ti rotor (Beckman  
424 Coulter, Inc.). The pellets were suspended in washing buffer (20 mM Tris-HCl, pH=7.5;  
425 500mM NH<sub>4</sub>Cl, 10.5mM Mg acetate, 0.5mM EDTA and 1 mM TCEP added before use),  
426 and centrifuged through a 10–35% sucrose gradient for 19 h at 16,000 rpm in a SW28  
427 rotor (Beckman Coulter, Inc.). Fractions containing the 70S peaks were pooled and kept  
428 at -80°C for further use.

429 Ribosomes for NMR experiments were obtained from New England Biolabs.

430

### 431 **Electron Microscopy**

432 Purified 70S ribosomes were incubated with full-length NusG at a ratio of 1:7 for 40 min  
433 at room temperature, prior to blotting and plunge-freezing as previously described  
434 (Grassucci et al., 2007). Data were collected on a TF30 Polara electron microscope (FEI,  
435 Portland, Oregon) at 300kV using a K2 Summit direct electron detector camera (Gatan,  
436 Pleasanton, CA). Images were recorded using the automated data collection system  
437 Leginon (Suloway et al., 2005) in counting mode, and taken at the nominal magnification  
438 of 32,000x, corresponding to a calibrated pixel size of 1.66Å.

439 **Image processing**

440 A total of 188,127 particles were automatically extracted from 1327 images using  
441 Arachnid (Langlois et al., 2014). RELION (Scheres, 2012) 3D classification was used to  
442 resolve the heterogeneity of the particle images, and auto-refinement to further improve  
443 resolution for each class. The final refinement for the NusG-bound 70S class containing  
444 17,122 particles yielded an average resolution of  $\sim 6.8\text{\AA}$  (FSC=0.143; following “gold  
445 standard” protocol).

446

447 **Model building**

448 The starting model was assembled from the X-ray structure of the *E. coli* 30S ribosomal  
449 subunit (PDB ID 4GD2) and the NMR solution structure of the NusG-CTD (PDB 2KVQ  
450 chain G). This starting model was first docked into the segmented maps of our 70S  
451 density map as a rigid body using UCSF Chimera (Pettersen et al., 2004). Then it was  
452 fitted into the segmented map using the Molecular Dynamic Flexibly Fitting (MDFF)  
453 method (Trabuco et al., 2008) and run using the NAMD program (Phillips et al., 2005) for  
454 0.5 ns of simulation time, followed by 5,000 steps of energy minimization.

455

456 **NMR spectroscopy.** NMR experiments were conducted on Bruker Ascend Aeon 900 and  
457 1000 MHz spectrometers equipped with cryogenically cooled, inverse triple resonance  
458 probes at 298 K. NMR data was converted and processed using in-house software. 2D  
459 correlation spectra were visualized and analyzed with NMRViewJ (One Moon Scientific,  
460 Inc., Westfield, NJ, USA), 1D spectra were plotted using MatLab (The MathWorks, Inc.,

461 Version 9.2.0.538062). Resonance assignments for NusG methyl groups were taken from  
462 a previous study (Mooney et al., 2009).  
463 [ILV]-NusG-CTD was in 10 mM K-phosphate (pH 7.5), 50 mM KCl, 1 mM MgCl<sub>2</sub>, 99.9  
464 % (v/v) D<sub>2</sub>O, [ILV]-NusG-NTD in 50 mM Na-phosphate (pH 7.5), 50 mM KCl, 0.3 mM  
465 EDTA, 5 % (v/v) d<sub>7</sub>-glycerol, 0.01 % (w/v) NaN<sub>3</sub>, 99.9 % D<sub>2</sub>O. For the titration of [ILV]-  
466 NusG with RNAP and S10<sup>D</sup>:NusB, all proteins were in 50 mM Na-phosphate (pH 7.5),  
467 50 mM KCl, 0.3 mM EDTA, 99.9 % (v/v) D<sub>2</sub>O and 5 mM MgCl<sub>2</sub> and 2 mM DTT were  
468 added to the NMR sample to increase the-long-term stability of RNAP. For all interaction  
469 studies involving ribosomes and for the titration of [ILV]-NusG-F165A with S10<sup>A</sup>:NusB,  
470 all components were in 20 mM HEPES-KOH (pH 7.6), 10 mM Mg-acetate, 30 mM KCl,  
471 7 mM β-mercaptoethanol, 10 % D<sub>2</sub>O. The titration of [ILV]-NusG-F165A with  
472 S10<sup>A</sup>:NusB was conducted in a 5 mm tube with an initial sample volume of 550 μl. All  
473 other measurements were carried out in 3 mm NMR tubes with an (initial) volume of 200  
474 μl.  
475 1D and 2D titration experiments were evaluated quantitatively by analyzing either  
476 changes in signal intensity or changes in chemical shifts. If chemical shift changes were  
477 in the fast regime on the chemical shift the normalized chemical shift perturbation  
478 ( $\Delta\delta_{norm}$ ) was calculated according to equation 1.

479

$$480 \quad \Delta\delta_{norm} = \sqrt{(\Delta\delta^{1H})^2 + [0.25 (\Delta\delta^{13C})]^2} \quad (1)$$

481 with  $\Delta\delta$  being the resonance frequency difference between the initial and final state of the  
482 titration (i.e. [ILV]-NusG:RNAP:S10<sup>D</sup>:NusB = 1:2:0:0 vs. 1:2:2:2) in ppm.

483

484 If the system was in slow or intermediate chemical exchange the signal intensities were  
485 analyzed quantitatively. First, the intensity of each 1D spectrum or methyl group signal,  
486 respectively, was normalized by the concentration of the [ILV]-labeled protein, the  
487 receiver gain, the number of scans, and the length of the 90° <sup>1</sup>H pulse. Then the relative  
488 intensity, i.e. the ratio of the normalized signal intensity of [ILV]-labeled protein in the  
489 respective titration step to the normalized signal intensity of free [ILV]-labeled protein,  
490 was calculated and plotted against the sequence of NusG or the NusG variant,  
491 respectively.

492

493 **qRT-PCR.** Total RNA was extracted from cells grown in M9 medium supplemented  
494 with casamino acids (0.2%) at 37<sup>0</sup>C to mid-log phase (O.D. 600=0.3). Fold-increase of  
495 the PCR product was determined using qRT-PCR. cDNA was synthesized using RNA  
496 was extracted from logarithmically growing cultures (O.D.<sub>600</sub>=0.2-0.3) Where indicated,  
497 cells were treated with BCM (100µg/ml) 1 min before induction with 1mM IPTG for  
498 *lacZ*. Samples were removed (0.5ml) at the indicated times and total RNA extracted  
499 RNA extracted using Qiagen RNeasy and Qiagen RNAprotect Bacteria Reagent (Qiagen,  
500 Germantown, MD). cDNA was synthesized from the samples using High Capacity RNA  
501 to cDNA kit (ThermoFisher, Waltham, MA). qRT-PCR reactions were performed using  
502 Taqman Gene Expression Master Mix (Thermofisher, Waltham, MA) and Biorad DNA  
503 Engine Opticon2 Real-Time Cycler (Bio-Rad Laboratories, Hercules, CA) and  
504 PrimeTime qPCR probes (Integrated DNA Technologies, Coralville, IA). The *lacA*  
505 transcript was probed with the following: probe:5'-/56-  
506 FAM/CCACATGAC/ZEN/TTCCGATCCAGACGTT/3IABkFQ/-3'; primer1:5'-



507 ATACTACCCGCGCCAATAAC; primer2:5'-CCCTGTACACCATGAATTGAGA).  
508 The reference gene was *ompA*(probe:5'-/56-  
509 FAM/CAACAACAT/ZEN/CGGTGACGCACACAC /3IABkFQ/-3'; primer1:5'-  
510 TGACCGAAACGGTAGGAAAC; primer2:5'-ACGCGATCACTCCTGAAATC). The  
511 PCR was performed using the following conditions: 50 °C for 10 min., 95 °C for 2 min,  
512 followed by 40 cycles each of 95 °C for 15s, and 60 °C 1min. All reactions were  
513 performed in duplicate. Fold increases were calculated from measured  $C_t$  values using  
514 the  $\Delta\Delta C_t$  method (Livak and Schmittgen, 2001). Values are the average of three or more  
515 independent experiments.

516

517  **$\beta$ -galactosidase assays.** Cultures were grown in LB to early log phase (O.D. 600 =0.3)  
518 at 37 °C. Where indicated bicyclomycin (BCM) (100 $\mu$ g/ml) was added to inhibit Rho-  
519 dependent transcription termination prior to induction of *lacZ* with 1mm IPTG. Where  
520 indicated  $\lambda$ N was expressed by incubation at 42 °C. Reactions were terminated 15 min.  
521 after induction.  $\beta$ -galactosidase was measured using a modification of the method of  
522 Miller (Zhang and Bremer, 1995). Readthrough was calculated from the ratio of  $\beta$ -  
523 galactosidase activity +/- BCM.

524

525 **Author Contributions:** R.W., Y.H., M.S., W.L., B.S. P.K.Z. and S.H. performed the  
526 experiments. J.F., Y.H., M.S., R.W. P.K.Z. S.H.K. and M.G. designed the experiments  
527 and interpreted the results. M.S. M.G. M.S. P.K.Z. S.H.K. and J.F. wrote the paper.

528

529 **Acknowledgments:** We gratefully acknowledge the help of D. Shapoval, M. Bubunenکو,  
530 N. Costantino and D. Court. We have had numerous useful discussions with P. Roesch  
531 and his group, for which we are most indebted. Supported by HHMI and NIH R01  
532 GM29169 (to J.F.), NIH R01 GM037219 (to M.G.) and the German Research  
533 Foundation grant Ro617/21-1 (to P.R.). S.H. was supported by an Amgen Fellowship.

534

535 **Competing interests.** We declare no competing interests.

536 **References**

- 537 Adhya S, Gottesman M. 1978. Control of transcription termination. *Annu Rev Biochem*  
538 **47**:967–996. doi:10.1146/annurev.bi.47.070178.004535
- 539 Artsimovitch I, Knauer SH. 2019. Ancient Transcription Factors in the News. *MBio* **10**.  
540 doi:10.1128/mBio.01547-18
- 541 Belogurov GA, Vassylyeva MN, Svetlov V, Klyuyev S, Grishin NV, Vassylyev DG,  
542 Artsimovitch I. 2007. Structural basis for converting a general transcription factor into an  
543 operon-specific virulence regulator. *Mol Cell* **26**:117–129.  
544 doi:10.1016/j.molcel.2007.02.021
- 545 Burmann BM, Knauer SH, Sevostyanova A, Schweimer K, Mooney RA, Landick R,  
546 Artsimovitch I, Rösch P. 2012. An  $\alpha$  helix to  $\beta$  barrel domain switch transforms the  
547 transcription factor RfaH into a translation factor. *Cell* **150**:291–303.  
548 doi:10.1016/j.cell.2012.05.042
- 549 Burmann BM, Scheckenhofer U, Schweimer K, Rösch P. 2011. Domain interactions of  
550 the transcription-translation coupling factor *Escherichia coli* NusG are intermolecular and  
551 transient. *Biochem J* **435**:783–789. doi:10.1042/BJ20101679
- 552 Burmann BM, Schweimer K, Luo X, Wahl MC, Stitt BL, Gottesman ME, Rösch P. 2010.  
553 A NusE:NusG complex links transcription and translation. *Science* **328**:501–504.  
554 doi:10.1126/science.1184953
- 555 Burns CM, Richardson JP. 1995. NusG is required to overcome a kinetic limitation to  
556 Rho function at an intragenic terminator. *Proc Natl Acad Sci USA* **92**:4738–4742.  
557 doi:10.1073/pnas.92.11.4738
- 558 Burova E, Hung SC, Sagitov V, Stitt BL, Gottesman ME. 1995. *Escherichia coli* NusG

559 protein stimulates transcription elongation rates in vivo and in vitro. *J Bacteriol*  
560 **177**:1388–1392. doi:10.1128/jb.177.5.1388-1392.1995

561 Cardinale CJ, Washburn RS, Tadigotla VR, Brown LM, Gottesman ME, Nudler E. 2008.  
562 Termination factor Rho and its cofactors NusA and NusG silence foreign DNA in *E. coli*.  
563 *Science* **320**:935–938. doi:10.1126/science.1152763

564 Conn AB, Diggs S, Tam TK, Blaha GM. 2019. Two Old Dogs, One New Trick: A  
565 Review of RNA Polymerase and Ribosome Interactions during Transcription-Translation  
566 Coupling. *Int J Mol Sci* **20**. doi:10.3390/ijms20102595

567 Das HK, Goldstein A, Lowney LI. 1967. Attachment of ribosomes to nascent messenger  
568 RNA in *Escherichia coli*. *J Mol Biol* **24**:231–245. doi:10.1016/0022-2836(67)90329-4

569 Demo G, Rasouly A, Vasilyev N, Svetlov V, Loveland AB, Diaz-Avalos R, Grigorieff N,  
570 Nudler E, Korostelev AA. 2017. Structure of RNA polymerase bound to ribosomal 30S  
571 subunit. *Elife* **6**. doi:10.7554/eLife.28560

572 Drögemüller J, Strauß M, Schweimer K, Jurk M, Rösch P, Knauer SH. 2015.  
573 Determination of RNA polymerase binding surfaces of transcription factors by NMR  
574 spectroscopy. *Sci Rep* **5**:16428. doi:10.1038/srep16428

575 Dudenhoefter BR, Schneider H, Schweimer K, Knauer SH. 2019. SuhB is an integral part  
576 of the ribosomal antitermination complex and interacts with NusA. *Nucleic Acids Res*  
577 **47**:6504–6518. doi:10.1093/nar/gkz442

578 Dutta D, Shatalin K, Epshtein V, Gottesman ME, Nudler E. 2011. Linking RNA  
579 polymerase backtracking to genome instability in *E. coli*. *Cell* **146**:533–543.  
580 doi:10.1016/j.cell.2011.07.034

581 Fan H, Conn AB, Williams PB, Diggs S, Hahm J, Gamper HB, Hou Y-M, O’Leary SE,

- 582 Wang Y, Blaha GM. 2017. Transcription-translation coupling: direct interactions of RNA  
583 polymerase with ribosomes and ribosomal subunits. *Nucleic Acids Res* **45**:11043–11055.  
584 doi:10.1093/nar/gkx719
- 585 Fu J, Hashem Y, Wower I, Lei J, Liao HY, Zwieb C, Wower J, Frank J. 2010.  
586 Visualizing the transfer-messenger RNA as the ribosome resumes translation. *EMBO J*  
587 **29**:3819–3825. doi:10.1038/emboj.2010.255
- 588 Grassucci RA, Taylor DJ, Frank J. 2007. Preparation of macromolecular complexes for  
589 cryo-electron microscopy. *Nat Protoc* **2**:3239–3246. doi:10.1038/nprot.2007.452
- 590 Kang JY, Mooney RA, Nedialkov Y, Saba J, Mishanina TV, Artsimovitch I, Landick R,  
591 Darst SA. 2018. Structural Basis for Transcript Elongation Control by NusG Family  
592 Universal Regulators. *Cell* **173**:1650-1662.e14. doi:10.1016/j.cell.2018.05.017
- 593 Knowlton JR, Bubunenko M, Andrykovitch M, Guo W, Routzahn KM, Waugh DS,  
594 Court DL, Ji X. 2003. A spring-loaded state of NusG in its functional cycle is suggested  
595 by X-ray crystallography and supported by site-directed mutants. *Biochemistry* **42**:2275–  
596 2281. doi:10.1021/bi0272508
- 597 Kohler R, Mooney RA, Mills DJ, Landick R, Cramer P. 2017. Architecture of a  
598 transcribing-translating expressome. *Science* **356**:194–197. doi:10.1126/science.aal3059
- 599 Krupp F, Said N, Huang Y-H, Loll B, Bürger J, Mielke T, Spahn CMT, Wahl MC. 2019.  
600 Structural Basis for the Action of an All-Purpose Transcription Anti-termination Factor.  
601 *Mol Cell*. doi:10.1016/j.molcel.2019.01.016
- 602 Kyrpides NC, Woese CR, Ouzounis CA. 1996. KOW: a novel motif linking a bacterial  
603 transcription factor with ribosomal proteins. *Trends Biochem Sci* **21**:425–426.
- 604 Langlois R, Pallesen J, Ash JT, Nam Ho D, Rubinstein JL, Frank J. 2014. Automated

605 particle picking for low-contrast macromolecules in cryo-electron microscopy. *J Struct*  
606 *Biol* **186**:1–7. doi:10.1016/j.jsb.2014.03.001

607 Larson MH, Mooney RA, Peters JM, Windgassen T, Nayak D, Gross CA, Block SM,  
608 Greenleaf WJ, Landick R, Weissman JS. 2014. A pause sequence enriched at translation  
609 start sites drives transcription dynamics *in vivo*. *Science* **344**:1042–1047.  
610 doi:10.1126/science.1251871

611 Lawson MR, Ma W, Bellecourt MJ, Artsimovitch I, Martin A, Landick R, Schulten K,  
612 Berger JM. 2018. Mechanism for the regulated control of transcription by a universal  
613 adapter protein. *Mol Cell* **71**:1–12.

614 Livak KJ, Schmittgen TD. 2001. Analysis of relative gene expression data using real-time  
615 quantitative PCR and the 2(-Delta Delta C(T)) Method. *Methods* **25**:402–408.  
616 doi:10.1006/meth.2001.1262

617 Luo X, Hsiao H-H, Bubunenko M, Weber G, Court DL, Gottesman ME, Urlaub H, Wahl  
618 MC. 2008. Structural and functional analysis of the *E. coli* NusB-S10 transcription  
619 antitermination complex. *Mol Cell* **32**:791–802. doi:10.1016/j.molcel.2008.10.028

620 Mehdi Q, Yudkin MD. 1967. Coupling of transcription to translation in the induced  
621 synthesis of beta-galactosidase. *Biochim Biophys Acta* **149**:288–290. doi:10.1016/0005-  
622 2787(67)90710-1

623 Meyer O, Schlegel HG. 1983. Biology of aerobic carbon monoxide-oxidizing bacteria.  
624 *Annu Rev Microbiol* **37**:277–310. doi:10.1146/annurev.mi.37.100183.001425

625 Miller OL, Hamkalo BA, Thomas CA. 1970. Visualization of bacterial genes in action.  
626 *Science* **169**:392–395. doi:10.1126/science.169.3943.392

627 Mitra P, Ghosh G, Hafeezunnisa M, Sen R. 2017. Rho Protein: Roles and Mechanisms.

- 628 *Annu Rev Microbiol* **71**:687–709. doi:10.1146/annurev-micro-030117-020432
- 629 Mooney Rachel A., Davis SE, Peters JM, Rowland JL, Ansari AZ, Landick R. 2009.
- 630 Regulator trafficking on bacterial transcription units *in vivo*. *Mol Cell* **33**:97–108.
- 631 doi:10.1016/j.molcel.2008.12.021
- 632 Mooney Rachel Anne, Schweimer K, Rösch P, Gottesman M, Landick R. 2009. Two
- 633 structurally independent domains of *E. coli* NusG create regulatory plasticity via distinct
- 634 interactions with RNA polymerase and regulators. *J Mol Biol* **391**:341–358.
- 635 doi:10.1016/j.jmb.2009.05.078
- 636 Newton WA, Beckwith JR, Zipser D, Brenner S. 1965. Nonsense mutants and polarity in
- 637 the *lac* operon of *Escherichia coli*. *J Mol Biol* **14**:290–296. doi:10.1016/s0022-
- 638 2836(65)80250-9
- 639 Pani B, Nudler E. 2017. Mechanistic insights into transcription coupled DNA repair.
- 640 *DNA Repair (Amst)* **56**:42–50. doi:10.1016/j.dnarep.2017.06.006
- 641 Pettersen EF, Goddard TD, Huang CC, Couch GS, Greenblatt DM, Meng EC, Ferrin TE.
- 642 2004. UCSF Chimera--a visualization system for exploratory research and analysis. *J*
- 643 *Comput Chem* **25**:1605–1612. doi:10.1002/jcc.20084
- 644 Phillips JC, Braun R, Wang W, Gumbart J, Tajkhorshid E, Villa E, Chipot C, Skeel RD,
- 645 Kalé L, Schulten K. 2005. Scalable molecular dynamics with NAMD. *J Comput Chem*
- 646 **26**:1781–1802. doi:10.1002/jcc.20289
- 647 Proshkin S, Rahmouni AR, Mironov A, Nudler E. 2010. Cooperation between translating
- 648 ribosomes and RNA polymerase in transcription elongation. *Science* **328**:504–508.
- 649 doi:10.1126/science.1184939
- 650 Rae CD, Gordiyenko Y, Ramakrishnan V. 2019. How a circularized tmRNA moves

651 through the ribosome. *Science* **363**:740–744. doi:10.1126/science.aav9370

652 Roche ED, Sauer RT. 1999. SsrA-mediated peptide tagging caused by rare codons and  
653 tRNA scarcity. *EMBO J* **18**:4579–4589. doi:10.1093/emboj/18.16.4579

654 Said N, Krupp F, Anedchenko E, Santos KF, Dybkov O, Huang Y-H, Lee C-T, Loll B,  
655 Behrmann E, Bürger J, Mielke T, Loerke J, Urlaub H, Spahn CMT, Weber G, Wahl MC.  
656 2017. Structural basis for  $\lambda$ N-dependent processive transcription antitermination. *Nat*  
657 *Microbiol* **2**:17062. doi:10.1038/nmicrobiol.2017.62

658 Sambrook J, Russel DW. 2001. Molecular Cloning: A Laboratory Manual, Third Edition.  
659 ed. New York: Cold Spring Harbor Press.

660 Saxena S, Myka KK, Washburn R, Costantino N, Court DL, Gottesman ME. 2018.  
661 *Escherichia coli* transcription factor NusG binds to 70S ribosomes. *Mol Microbiol*  
662 **108**:495–504. doi:10.1111/mmi.13953

663 Scheres SHW. 2012. RELION: implementation of a Bayesian approach to cryo-EM  
664 structure determination. *J Struct Biol* **180**:519–530. doi:10.1016/j.jsb.2012.09.006

665 Sevostyanova A, Belogurov GA, Mooney RA, Landick R, Artsimovitch I. 2011. The  $\beta$   
666 subunit gate loop is required for RNA polymerase modification by RfaH and NusG. *Mol*  
667 *Cell* **43**:253–262. doi:10.1016/j.molcel.2011.05.026

668 Sharan SK, Thomason LC, Kuznetsov SG, Court DL. 2009. Recombineering: a  
669 homologous recombination-based method of genetic engineering. *Nat Protoc* **4**:206–223.  
670 doi:10.1038/nprot.2008.227

671 Silhavy TJ, Berman ML, Enquist LW, editors. 1984. Experiments with Gene Fusions.  
672 Cold Spring Harbor (NY): Cold Spring Harbor Laboratory Press.

673 Squires CL, Greenblatt J, Li J, Condon C, Squires CL. 1993. Ribosomal RNA



674 antitermination in vitro: requirement for Nus factors and one or more unidentified cellular  
675 components. *Proc Natl Acad Sci USA* **90**:970–974.

676 Suloway C, Pulokas J, Fellmann D, Cheng A, Guerra F, Quispe J, Stagg S, Potter CS,  
677 Carragher B. 2005. Automated molecular microscopy: the new Leginon system. *J Struct*  
678 *Biol* **151**:41–60. doi:10.1016/j.jsb.2005.03.010

679 Thommen M, Holtkamp W, Rodnina MV. 2017. Co-translational protein folding:  
680 progress and methods. *Curr Opin Struct Biol* **42**:83–89. doi:10.1016/j.sbi.2016.11.020

681 Trabuco LG, Villa E, Mitra K, Frank J, Schulten K. 2008. Flexible fitting of atomic  
682 structures into electron microscopy maps using molecular dynamics. *Structure* **16**:673–  
683 683. doi:10.1016/j.str.2008.03.005

684 Vogel U, Jensen KF. 1995. Effects of the antiterminator *BoxA* on transcription elongation  
685 kinetics and ppGpp inhibition of transcription elongation in *Escherichia coli*. *J Biol Chem*  
686 **270**:18335–18340. doi:10.1074/jbc.270.31.18335

687 Vogel U, Jensen KF. 1994. Effects of guanosine 3',5'-bisdiphosphate (ppGpp) on rate of  
688 transcription elongation in isoleucine-starved *Escherichia coli*. *J Biol Chem* **269**:16236–  
689 16241.

690 Vvedenskaya IO, Vahedian-Movahed H, Bird JG, Knoblauch JG, Goldman SR, Zhang Y,  
691 Ebright RH, Nickels BE. 2014. Interactions between RNA polymerase and the “core  
692 recognition element” counteract pausing. *Science* **344**:1285–1289.  
693 doi:10.1126/science.1253458

694 Washburn RS, Gottesman ME. 2011. Transcription termination maintains chromosome  
695 integrity. *Proc Natl Acad Sci USA* **108**:792–797. doi:10.1073/pnas.1009564108

696 Weis F, Bron P, Giudice E, Rolland J-P, Thomas D, Felden B, Gillet R. 2010. tmRNA-

697 SmpB: a journey to the centre of the bacterial ribosome. *EMBO J* **29**:3810–3818.  
698 doi:10.1038/emboj.2010.252

699 Werner F. 2012. A nexus for gene expression-molecular mechanisms of Spt5 and NusG  
700 in the three domains of life. *J Mol Biol* **417**:13–27. doi:10.1016/j.jmb.2012.01.031

701 Zhang X, Bremer H. 1995. Control of the Escherichia coli rrnB P1 promoter strength by  
702 ppGpp. *J Biol Chem* **270**:11181–11189. doi:10.1074/jbc.270.19.11181

703 Zuber PK, Artsimovitch I, NandyMazumdar M, Liu Z, Nedialkov Y, Schweimer K,  
704 Rösch P, Knauer SH. 2018. The universally-conserved transcription factor RfaH is  
705 recruited to a hairpin structure of the non-template DNA strand. *Elife* **7**.  
706 doi:10.7554/eLife.36349

707 Zuber PK, Schweimer K, Rösch P, Artsimovitch I, Knauer SH. 2019. Reversible fold-  
708 switching controls the functional cycle of the antitermination factor RfaH. *Nat Commun*  
709 **10**:702. doi:10.1038/s41467-019-08567-6

710  
711  
712

713 **Figures**

714

715

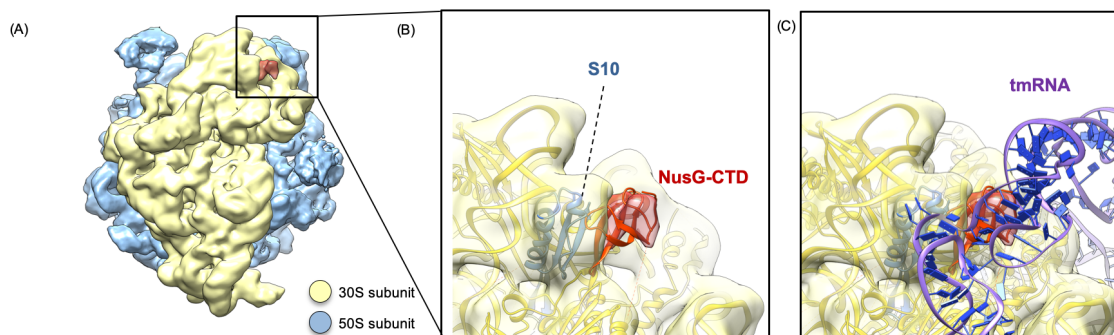

716

717 **Figure 1. Structure of NusG-CTD bound to 70S ribosome. (A)** Cryo-EM density of  
718 the 70S ribosome:NusG complex. The density of the 50S subunit is shown in light blue,  
719 the density of the 30S subunit in yellow, the density corresponding to NusG-CTD in red.  
720 **(B)** Close-up view of the region boxed in **(A)**. 70S (yellow), S10 (blue), and NusG-CTD  
721 (red) are in ribbon representation, cryo-EM density is shown as transparencies. **(C)**  
722 Superposition of the 70S:NusG complex with the 70S:tmRNA complex (tmRNA is in  
723 ribbon representation, purple and dark blue; EMD 5234, PDB: 3IZ4). 30S and NusG-  
724 CTD are displayed as in **(B)**.

725

726

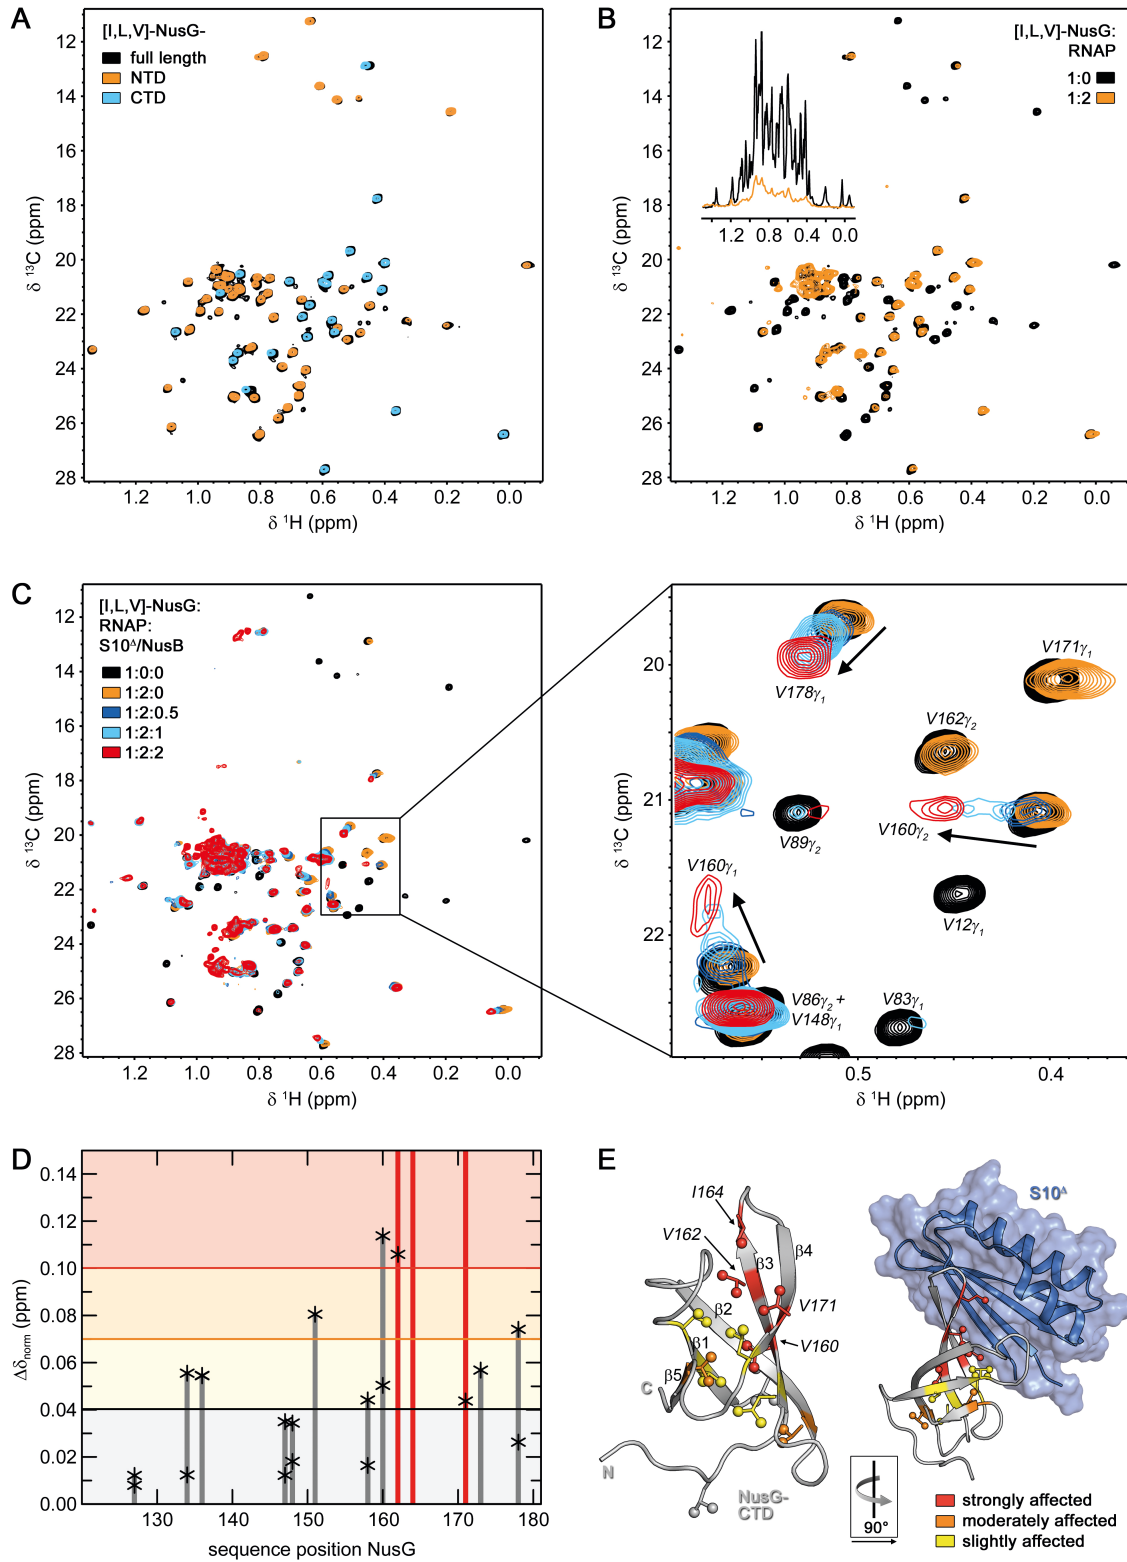

727

728 **Figure 2. RNAP-bound NusG interacts with S10. (A)** Superposition of 2D [<sup>1</sup>H, <sup>13</sup>C]-  
 729 methyl-TROSY spectra of [ILV]-NusG (black, 20  $\mu$ M), [ILV]-NusG-NTD (orange, 100

730  $\mu\text{M}$ ), and [ILV]-NusG-CTD (cyan, 30  $\mu\text{M}$ ). **(B)** 2D [ $^1\text{H}$ ,  $^{13}\text{C}$ ]-methyl-TROSY spectra of  
731 [ILV]-NusG in the absence (black, 20  $\mu\text{M}$ ) and presence (orange, 18  $\mu\text{M}$ ) of two  
732 equivalents of RNAP. Inset: Normalized 1D [ $^1\text{H}$ ,  $^{13}\text{C}$ ]-methyl TROSY spectra, colored as  
733 2D spectra. **(C)** 2D [ $^1\text{H}$ ,  $^{13}\text{C}$ ]-methyl-TROSY spectra of [ILV]-NusG alone (20  $\mu\text{M}$ ), in  
734 the presence of a twofold molar excess of RNAP (18  $\mu\text{M}$  [ILV]-NusG), and upon  
735 titration of [ILV]-NusG:RNAP with 218  $\mu\text{M}$  S10<sup>a</sup>:NusB. The molar ratio of [ILV]-  
736 NusG:RNAP:S10<sup>a</sup>:NusB is indicated in color. The panel on the right shows an  
737 enlargement of the boxed region. Selected signals are labeled and arrows indicate  
738 chemical shift changes upon S10<sup>a</sup>:NusB addition. **(D)** [ $^1\text{H}$ ,  $^{13}\text{C}$ ]-methyl-TROSY-derived  
739 normalized chemical shift changes of [ILV]-NusG-CTD methyl group signals of RNAP-  
740 bound [ILV]-NusG upon complex formation with S10<sup>a</sup>:NusB. Asterisks mark the values  
741 of individual methyl group signals, bars represent the highest values. Red bars indicate  
742 vanishing signals. Horizontal lines are thresholds for affected methyl groups: slightly  
743 affected ( $0.04 \text{ ppm} \leq \Delta\delta_{\text{norm}} < 0.07 \text{ ppm}$ ; black), moderately affected ( $0.07 \text{ ppm} \leq \Delta\delta_{\text{norm}}$   
744  $< 0.1 \text{ ppm}$ ; orange), and strongly affected ( $\Delta\delta_{\text{norm}} \geq 0.10 \text{ ppm}$ ; red). **(E)** Mapping of  
745 affected methyl groups on the structure of isolated NusG-CTD (left; PDB ID: 2JVY) and  
746 NusG-CTD in complex with S10<sup>a</sup> (right; PDB ID 2KVQ). NusG-CTD is shown in ribbon  
747 (gray), S10<sup>a</sup> in ribbon and surface (blue) representation. Affected Ile, Leu, and Val  
748 residues are colored according to **(D)**, non-affected Ile, Leu, and Val residues are gray.  
749 Side chains of Ile, Leu, and Val residues are depicted as sticks, their methyl groups as  
750 spheres. Strongly affected Ile, Leu, and Val residues are labeled. The orientation of  
751 NusG-CTD in the complex relative to the isolated state is indicated.  
752

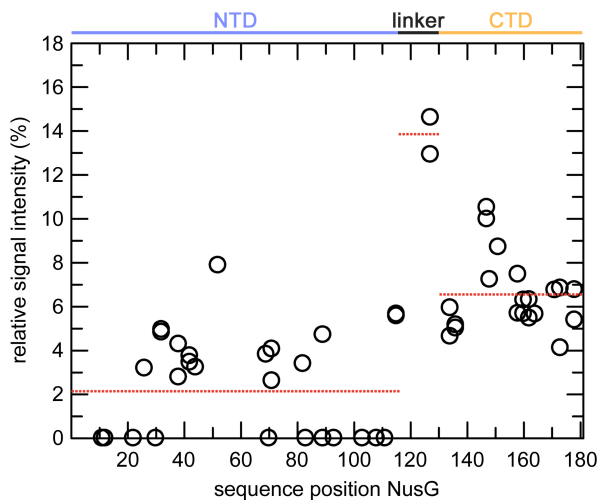

753

754 **Figure 2-figure supplement 1: Binding of [ILV]-NusG to RNAP.** [ $^1\text{H}$ ,  $^{13}\text{C}$ ]-methyl-

755 TROSY derived relative signal intensities of [ILV]-NusG methyl groups after addition of

756 two equivalents of RNAP (see Fig. 2B). Red, dashed horizontal lines indicate average

757 relative signal intensities of NusG-NTD, the linker, and NusG-CTD (domain organization

758 is indicated at the top). Related to Figure 2B.

759

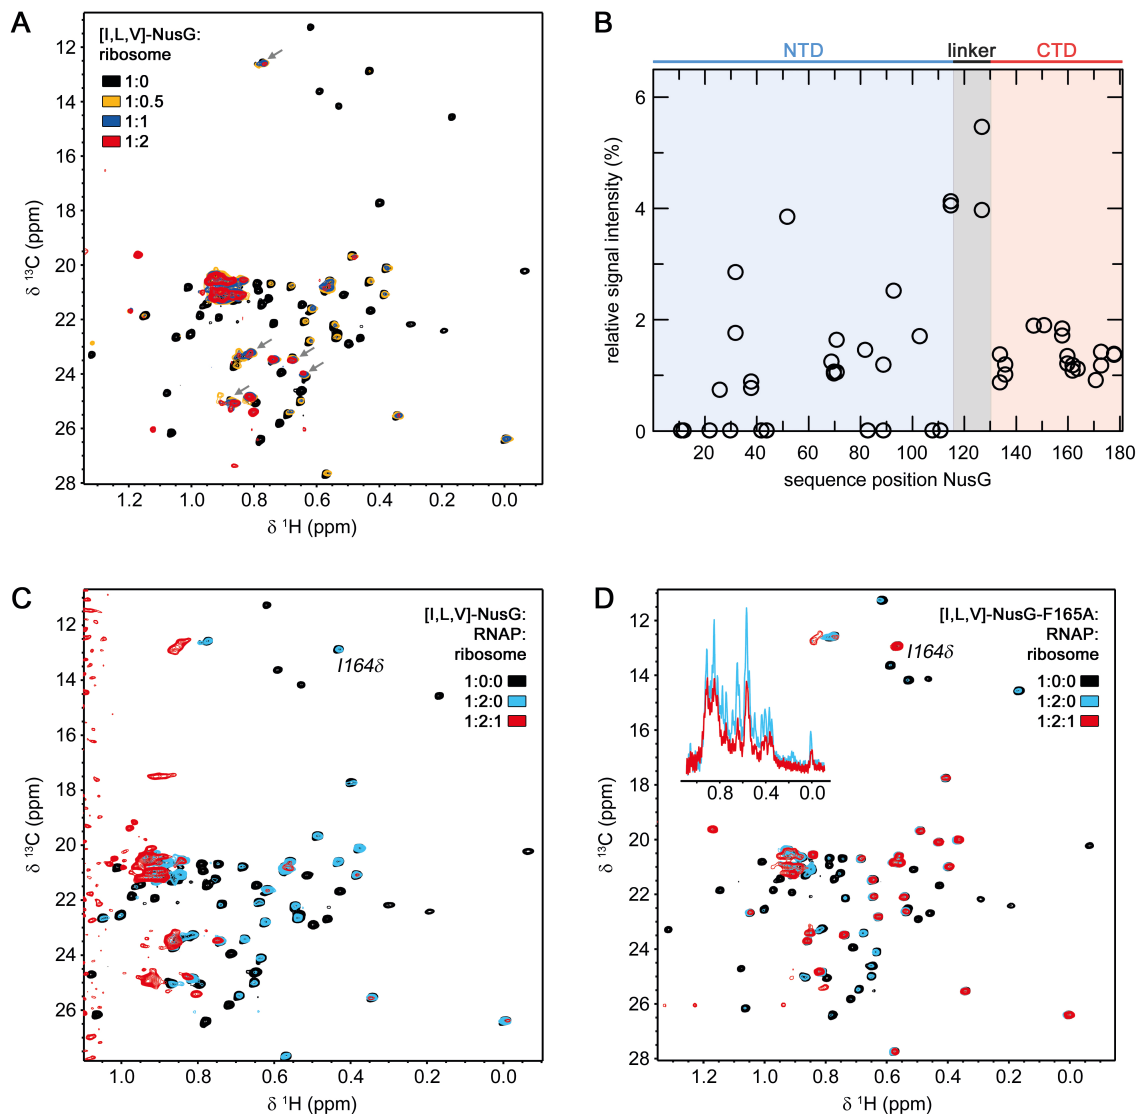

760

761 **Figure 3: RNAP-bound NusG interacts with the 70 S ribosome. (A,B)** NusG interacts

762 with 70S ribosome via its CTD. **(A)** 2D [<sup>1</sup>H, <sup>13</sup>C]-methyl-TROSY spectra of free [ILV]-

763 NusG (11 μM, black) and [ILV]-NusG in the presence of 70S ribosome (molar ratio

764 [ILV]-NusG:ribosome = 1:0.5 (6.6 μM [ILV]-NusG, orange); = 1:1 (7.5 μM [ILV]-

765 NusG, blue); = 1:2 (4 μM [ILV]-NusG, red). Arrows indicate [ILV]-NusG-NTD signals

766 that are well visible in the [ILV]-NusG:ribosome complex. **(B)** Quantitative analysis of

767 [ILV]-NusG methyl group signal intensities in the presence of 0.5 equivalents of 70S

768 ribosome. Relative signal intensities are plotted versus the sequence position of NusG.

769 The domain organization of NusG is indicated above the diagram. **(C)** 2D [ $^1\text{H}$ ,  $^{13}\text{C}$ ]-  
770 methyl-TROSY spectra of [ILV]-NusG (11  $\mu\text{M}$ , black), [ILV]-NusG in the presence of  
771 RNAP (molar ratio 1:2, 6  $\mu\text{M}$  [ILV]-NusG, blue), and [ILV]-NusG in the presence of  
772 RNAP and 70S ribosome (molar ratio 1:2:1, 6  $\mu\text{M}$  [ILV]-NusG, red). **(D)** 2D [ $^1\text{H}$ ,  $^{13}\text{C}$ ]-  
773 methyl-TROSY spectra of [ILV]-NusG<sup>F165A</sup> (20  $\mu\text{M}$ , black), [ILV]-NusG<sup>F165A</sup> in the  
774 presence of RNAP (molar ratio 1:2, 6  $\mu\text{M}$  [ILV]-NusG<sup>F165A</sup>, blue), and [ILV]-NusG<sup>F165A</sup>  
775 in the presence of RNAP and 70S ribosome (molar ratio 1:2:1, 6  $\mu\text{M}$  [ILV]-NusG<sup>F165A</sup>,  
776 red). The inset shows the normalized 1D spectra of the corresponding titration step.  
777



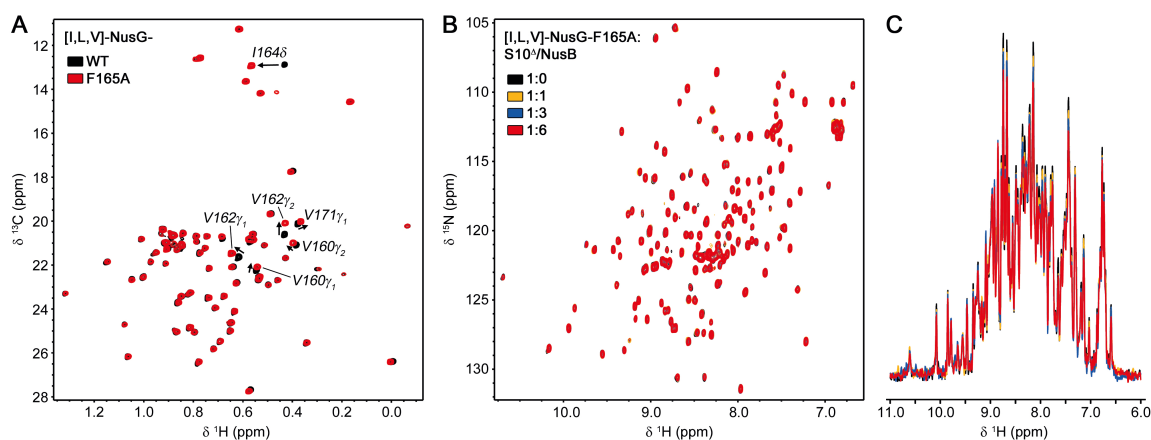

778

779 **Figure 3-figure supplement 1: NusG-F165A does not interact with S10<sup>A</sup>/NusB. (A)**

780 2D [ $^1\text{H}$ ,  $^{13}\text{C}$ ]-methyl-TROSY spectra of [ILV]-NusG (11  $\mu\text{M}$ , black) and [ILV]-

781 NusG<sup>F165A</sup> (20  $\mu\text{M}$ , red). Arrows and labels indicate NusG-CTD methyl groups affected

782 in their resonance frequencies by the F165A amino acid substitution. **(B,C)** 2D **(B)** and

783 normalized 1D **(C)** [ $^1\text{H}$ ,  $^{15}\text{N}$ ]-HSQC spectra of 20  $\mu\text{M}$  [ILV]-NusG<sup>F165A</sup> upon titration

784 with 432  $\mu\text{M}$  S10<sup>A</sup>/NusB (colors as indicated).

785

786

787

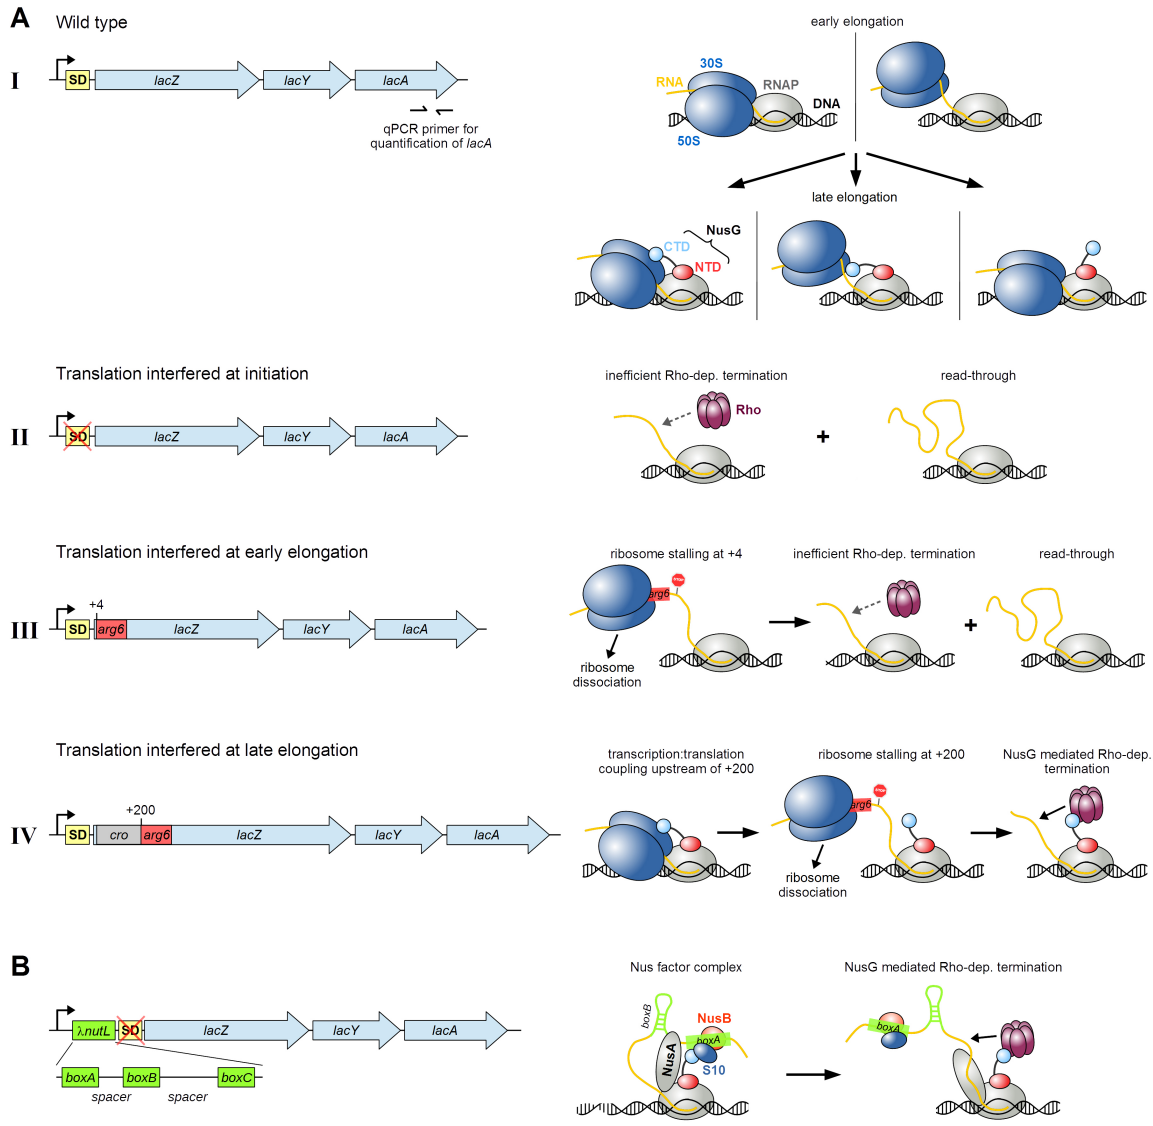

788

789 **Figure 4: Translation is required for NusG recruitment to the TEC. (A, B) Left:**

790 Organization of the *E. coli lac* operon in strains MDS42 (A-I; wild type *lacZ*), RSW1225

791 (A-II; mutant (inactive) *lacZ* SD sequence), RSW1245 (A-III; in-frame insertion of six

792 rare Arg codons (*arg6*) at position +4 of *lacZ*), RSW1276 (A-IV; in-frame insertion of

793 *lcro* and six rare Arg codons at position +4 of *lacZ* (equivalent to *arg6* being at position

794 +200 of the gene)), and RSW1297 (B; *λnutL* site upstream of mutant *lacZ* SD sequence).

795 SD sequences of *lacY* and *lacA* were omitted for clarity. qPCR primers specific to the 3'

796 end of *lacA* (position indicated in A-I) were used to measure mRNA levels and thereby

797 read-through of *lacA* (see Table 1). Right: Schemes of possible effects on  
798 transcription:translation coupling and Rho-dependent termination within *lacZ*. A-I, top:  
799 Ribosomes are recruited in the early elongation phase, leading to a directly coupled  
800 RNAP:ribosome complex (left) or uncoupled transcription and translation (right). A-I,  
801 bottom: NusG is recruited in late elongation, resulting in a NusG-coupled complex with  
802 (left) or without direct RNAP:ribosome contacts (middle), or modifying the pre-existing  
803 RNAP:ribosome complex without establishing an CTD:S10 interaction (right). A-II:  
804 Failure of NusG recruitment results in inefficient Rho-dependent termination and high  
805 *lacA* read-through. A-III: *arg6* stops the translating ribosome at position +4, whereas  
806 transcription elongation proceeds (left), resulting in ribosome dissociation and no NusG  
807 recruitment. Transcription proceeds and is only inefficiently terminated by Rho (right).  
808 A-IV: NusG couples transcription and translation (left) until *arg6* stops the ribosome at  
809 position +200 (middle), allowing efficient, NusG-stimulated Rho-dependent termination  
810 (right). B:  $\lambda$ *nutL* recruits NusA, NusG and the S10/NusB dimer, creating a Nus complex  
811 (left). NusG can thus support Rho-dependent termination.  
812  
813

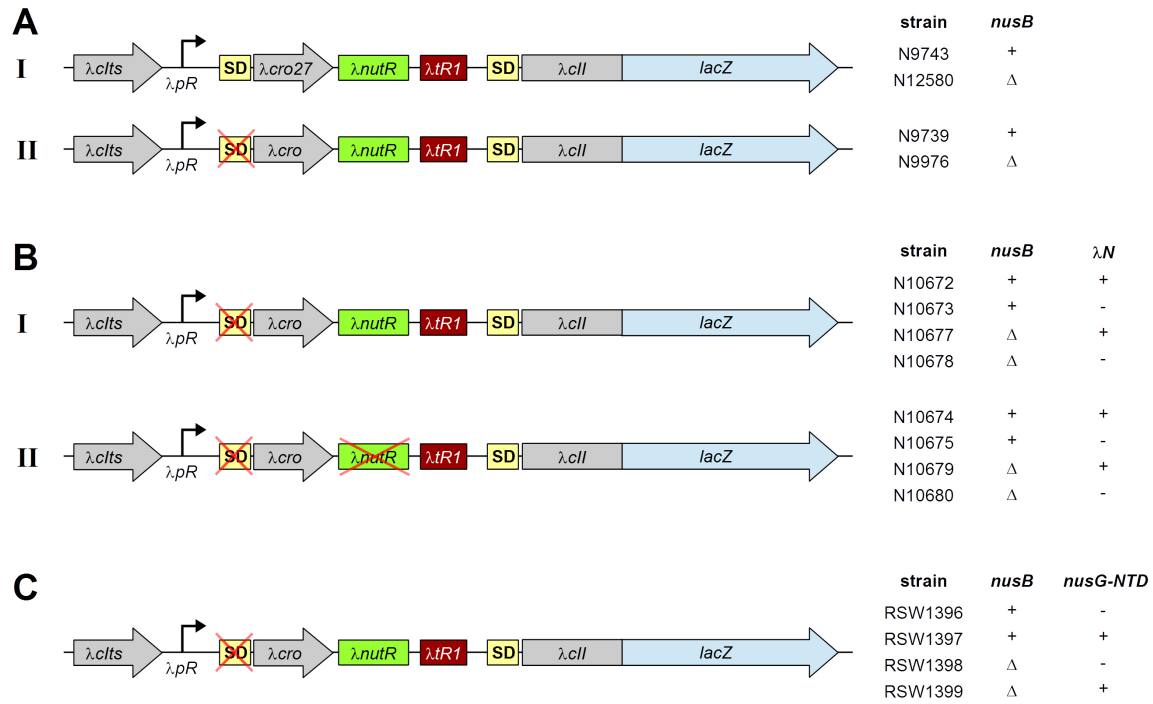

814

815 **Figure 5: NusG can be recruited *via* a Nus complex.** Genetic constructs used to  
 816 monitor NusG mediated Rho-dependent termination are shown with the corresponding  
 817 strains and their properties indicated on the right side. Transcription is started from the  
 818  $\lambda pR$  promoter, followed by WT- $\lambda cro$  or  $\lambda cro$  carrying a missense mutation at codon 27  
 819 ( $\lambda cro27$ ), a WT or mutant  $\lambda nutR$  site (B), the Rho-dependent terminator  $\lambda tR1$  and a  
 820  $\lambda cII::lacZ$  transcriptional fusion with corresponding SD site. All strains encode a  
 821 temperature sensitive  $\lambda cI$  construct ( $\lambda cIts$ ) to allow temperature-controlled induction of  
 822 gene expression from the  $\lambda pR$  promoter.  $\lambda N^+$  strains listed in (B) further encode the  $\lambda N$   
 823 protein; NusG-NTD for strains listed in (C) was supplied from plasmid pRM442. See  
 824 also tables 2A-C.

825

826 **Tables**

827

828 **Table 1. NusG couples late after transcription initiation.**  $\beta$ -galactosidase was induced  
829 for 20 min from the *lac* operon with 1mM IPTG. Where indicated, Rho-dependent  
830 termination was inhibited by adding 100 $\mu$ g/ml BCM 1 minute prior to induction. Read-  
831 through was calculated from the fold-increase of *lacA RNA* compared to *ompA RNA* in  
832 the presence or absence of BCM. RNA levels were measured using qRT-PCR and the  
833 fold- increase calculated using the  $\Delta\Delta C_t$  method (Livak and Schmittgen, 2001).  
834 RSW1225 carries two G to A mutations in the *lacZ* ribosome-binding site. RSW1245  
835 carries an insertion of six rare arginine codons (atg-acc-atg-AGG-AGA-CGA-AGG-  
836 AGA-CGA) at the amino terminus of *lacZ*. RSW1276 contains six rare arginine codons  
837 200nt distal to the start of translation. RSW1297 carries an insertion of  $\lambda nutL$   
838 immediately 5' to the mutated ribosome binding site.

| <b>strain</b> | <b><i>lacZ</i></b> | <b><i>nutL</i></b> | <b>BCM<sup>-</sup></b> | <b>BCM<sup>+</sup></b> | <b>RT (%)</b> |
|---------------|--------------------|--------------------|------------------------|------------------------|---------------|
| MDS42         | wt                 | -                  | .25                    | .26                    | 99            |
| RSW1225       | SD <sup>-</sup>    | -                  | .12                    | .56                    | 21            |
| RSW1245       | arg(6) - early     | -                  | .13                    | .49                    | 29            |
| RSW1276       | arg(6) - late      | -                  | <.01                   | .12                    | <1            |
| RSW1297       | SD <sup>-</sup>    | +                  | .01                    | .59                    | 1             |

839

840 **Table 2. NusG recruitment depends on translation. (A)** NusG coupling at *nutR* requires  
841 NusB. Expression of  $\beta$ -galactosidase was induced from a chromosomal *cII::lacZ*  
842 transcriptional fusion ( $\lambda cIts$ -*pR-cro-nutR-tR1-cII::lacZ*) by incubating at 42<sup>0</sup> C for 30 min.  
843 N9743 and N12580 carry a missense mutation at *cro* codon 27, N9739 and 9976 have a G  
844 to C mutation in the *cro* Shine Dalgarno sequence (*SD*-), N12580 and N9976 are deleted  
845 for *nusB*. Where indicated, bicyclomycin (BCM) was added to 100 $\mu$ g/ml prior to  
846 induction of  $\beta$ -galactosidase. Read-through (RT) was calculated from the ratio of  $\beta$ -  
847 galactosidase activity in the presence or absence of BCM. **(B)** BoxA mutations block  
848 NusG coupling at *nutR*. Expression of  $\beta$ -galactosidase was induced from a chromosomal  
849 *cII::lacZ* transcriptional fusion ( $\lambda cIts$ -*pR-cro (SD<sup>-</sup>)-nutR-tR1-cII::lacZ*) by incubating at  
850 42<sup>0</sup> C for 30 min. Strains N10672, N10674, N10677 and N10679 express the  $\lambda$ N  
851 transcription termination inhibitor. *boxA69* and  $\Delta$ *nusB* strain numbers are indicated in  
852 Table 3. Read-through (RT) was calculated from the ratio of  $\beta$ -galactosidase activity in the  
853 presence or absence of  $\lambda$ N. **(C)** NusG-NTD uncouples. Expression of  $\beta$ -galactosidase was  
854 induced from a chromosomal *cII::lacZ* transcriptional fusion ( $\lambda cIts$ -*pR-cro(SD<sup>-</sup>)-nutR-tR1-*  
855 *cII::lacZ*) by incubating at 42<sup>0</sup> C for 30 min. The NusG-NTD was induced from the  
856 plasmid pRM442 *tac* promoter with 1mM IPTG for 10 min prior to induction of  
857  $\beta$ -galactosidase in strains RSW1397 and RSW 1399. Strains RSW1396 and RSW1398  
858 carried an empty vector (*ptrc99A*) and were exposed to IPTG as above. Where indicated  
859 bicyclomycin (BCM) was added to 100 $\mu$ g/ml prior to induction of  $\beta$ -galactosidase. Read-  
860 through (RT) was calculated from the ratio of  $\beta$ -galactosidase activity in the presence or  
861 absence of BCM.

862

| <b>A</b> | <b>strain</b> | <i>cro</i>  | <i>nusB</i> | <b>BCM<sup>-</sup></b> | <b>BCM<sup>+</sup></b> | <b>RT (%)</b> |
|----------|---------------|-------------|-------------|------------------------|------------------------|---------------|
|          | 9743          | <i>ms27</i> | +           | 530                    | 680                    | 78            |
|          | 12580         | <i>ms27</i> | D           | 890                    | 1150                   | 78            |
|          | 9739          | SD-         | +           | 141                    | 613                    | <b>23</b>     |
|          | 9976          | SD-         | D           | 1191                   | 1290                   | 92            |

863

| <b>B</b> | <b>strain</b>   | <i>boxA</i> | <i>nusB</i> | $\lambda$ N <sup>-</sup> | $\lambda$ N <sup>+</sup> | <b>RT (%)</b> |
|----------|-----------------|-------------|-------------|--------------------------|--------------------------|---------------|
|          | 10673,<br>10672 | +           | +           | 126                      | 946                      | <b>13</b>     |
|          | 10675,<br>10674 | <i>69</i>   | +           | 1212                     | 2211                     | 55            |
|          | 10678,<br>10677 | +           | D           | 2874                     | 2616                     | 100           |
|          | 10680,<br>10679 | <i>69</i>   | D           | 1896                     | 2416                     | 78            |

864

| <b>C</b> | <b>strain</b> | <i>nusG-NTD</i> | <i>nusB</i> | <b>BCM<sup>-</sup></b> | <b>BCM<sup>+</sup></b> | <b>RT (%)</b> |
|----------|---------------|-----------------|-------------|------------------------|------------------------|---------------|
|          | RSW1396       | -               | +           | 247                    | 862                    | <b>29</b>     |
|          | RSW1397       | +               | +           | 944                    | 1013                   | 93            |

|  |         |   |          |      |      |    |
|--|---------|---|----------|------|------|----|
|  | RSW1398 | - | $\Delta$ | 2013 | 2314 | 93 |
|  | RSW1399 | + | $\Delta$ | 2360 | 2760 | 86 |

865

866

867
